# Supplementary material for: Biosynthesized Bimetallic (ZnOSnO2) Nanoparticles for Photocatalytic Degradation of Organic Dyes and Pharmaceutical Pollutants
Source: MDPI journal article supplement (doi:10.3390/catal12030334), 2022-03-16
Supplement: s1 [file s1]

**Bio-synthesised bimetallic (ZnO/SnO<sub>2</sub>) nanoparticles for photocatalytic degradation of organic dyes and pharmaceutical pollutants.**

Louisah M Mahlaule-Glory <sup>a</sup>, Sarah Mathobela and Nomso C Hintsho-Mbita<sup>a\*</sup>

<sup>a</sup> Department of Chemistry, University of Limpopo, Sovenga, Polokwane, 0727, Polokwane,, South Africa

\*Corresponding author: [nomso.hintsho-mbita@ul.ac.za](mailto:nomso.hintsho-mbita@ul.ac.za) Tel: +27 (0) 15 268 2205 Postal address:

Department of Chemistry, University of Limpopo, Private Bag X 1106, Sovenga 0727, Polokwane, South Africa

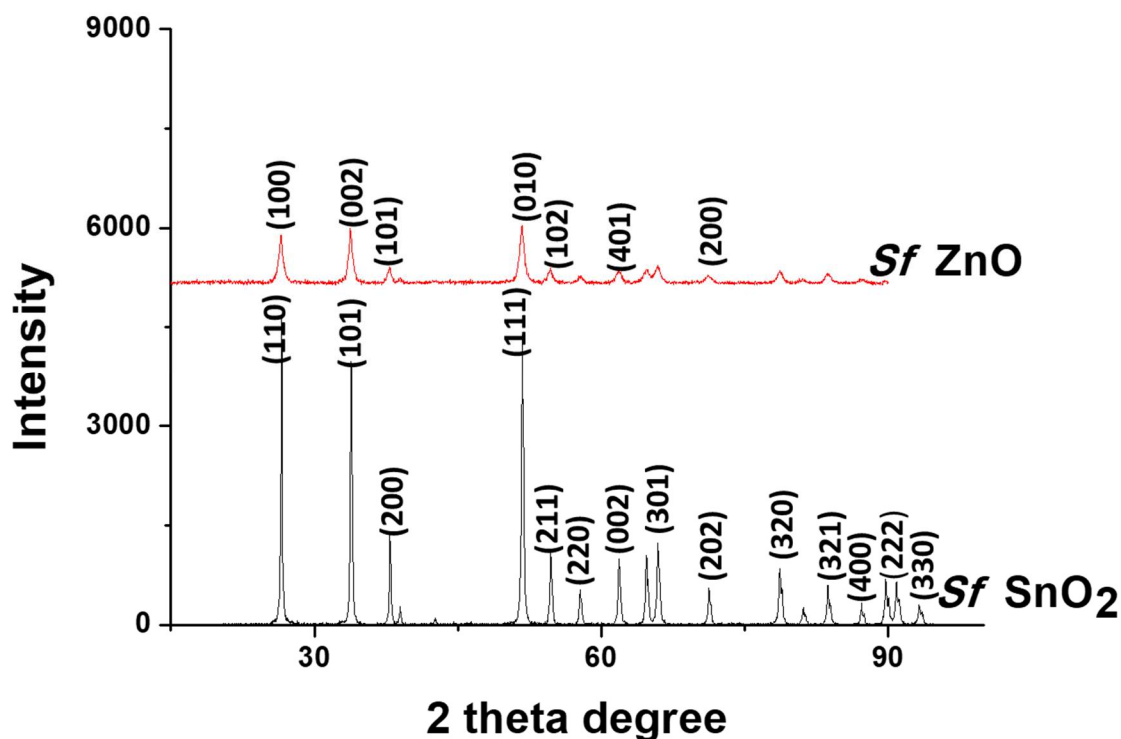

Figure S1: XRD analysis of Sf ZnO and XRD analysis of Sf SnO<sub>2</sub> nanoparticles

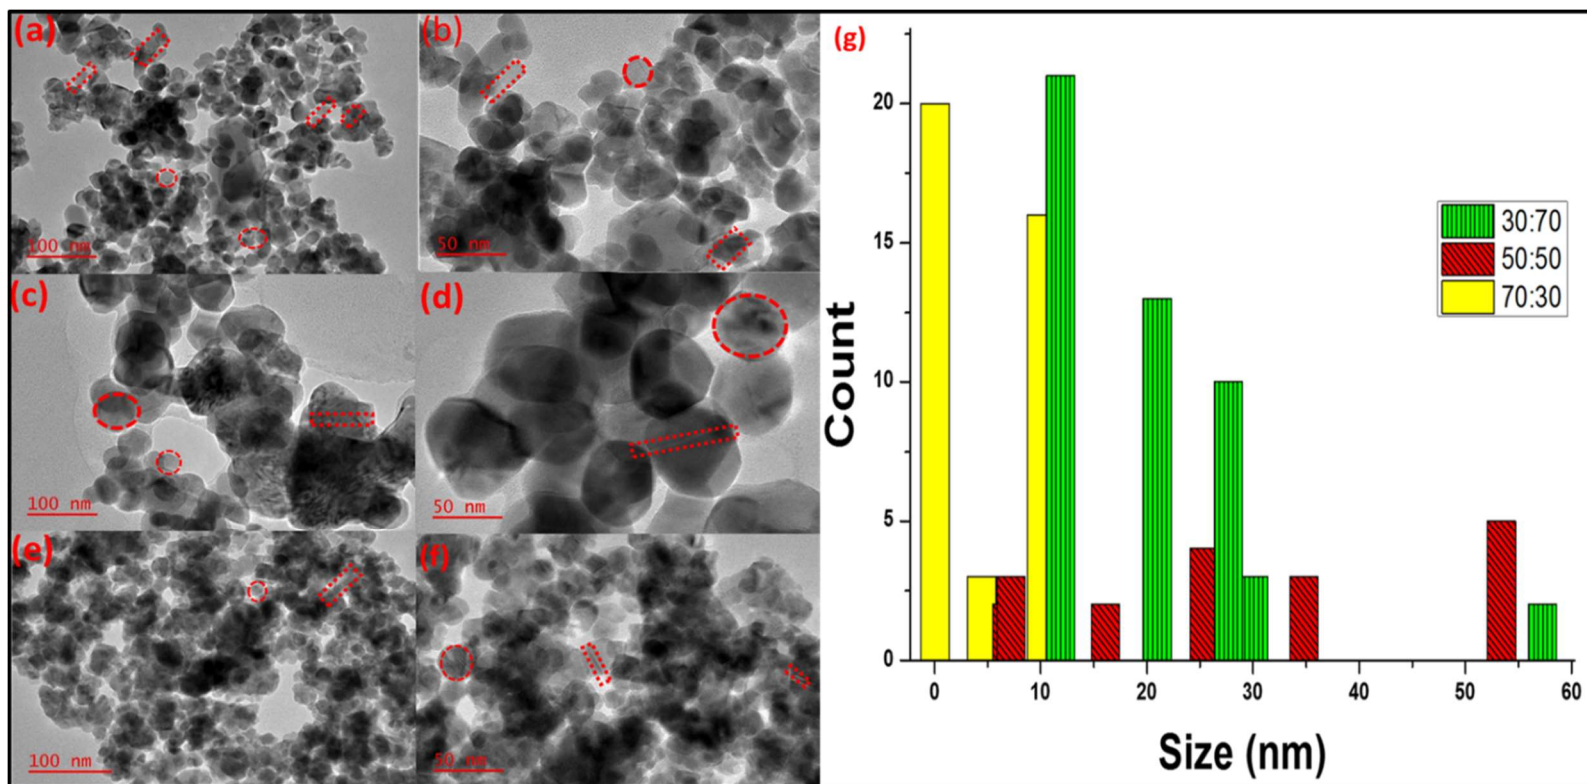

Figure S2 (a-f): Morphological analysis of the bimetallic nanoparticles at different resolutions, where (a) 30:70, (c) 50:50 and (e) 70:30 loadings at 100 nm whereas (b), (d) and (f) is at 50 nm, (g) particle size distribution

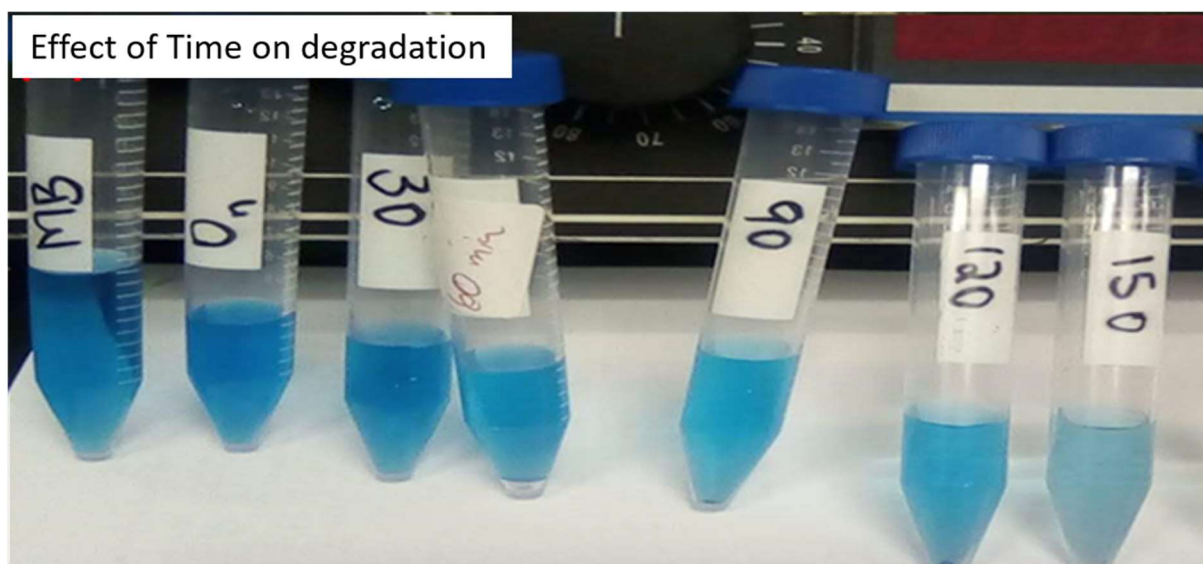

Figure S3: The images that exhibit the photocatalytic degradation of MB at different time intervals from 0-150 min
